# Supplementary figures and images for: Microsatellite instability in mismatch repair proficient colorectal cancer: clinical features and underlying molecular mechanisms
Source: PubMed Central journal article supplement — eBioMedicine. 2024 Apr 30;103:105142. doi: 10.1016/j.ebiom.2024.105142 (PMC11070601; doi:10.1016/j.ebiom.2024.105142), 2024-04-30

# Figure S1

*hMLH1*

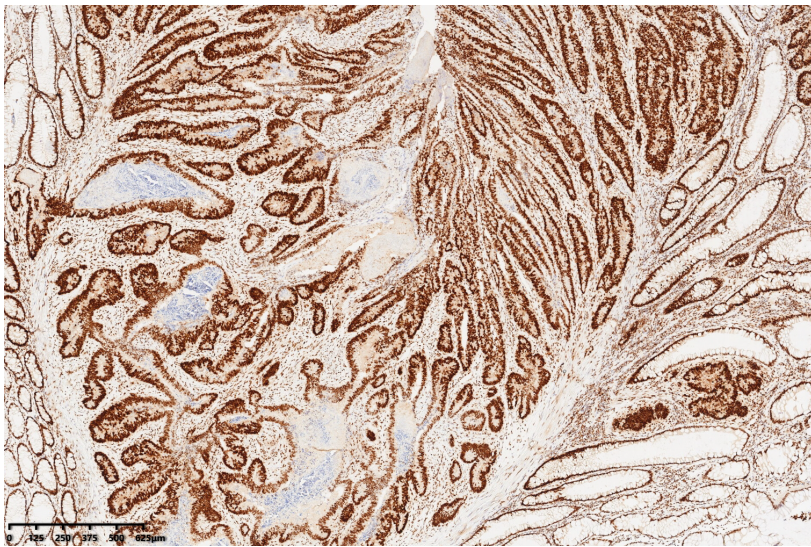

*hPMS2*

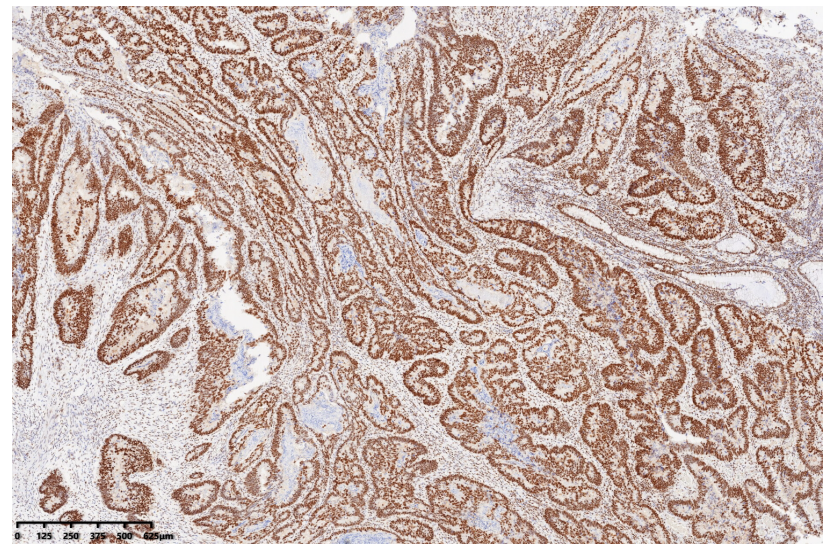

*hMSH2*

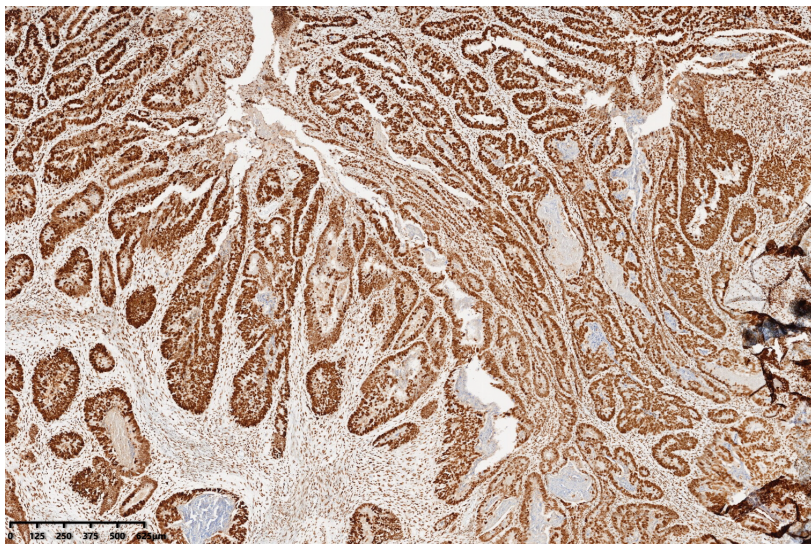

*hMSH6*

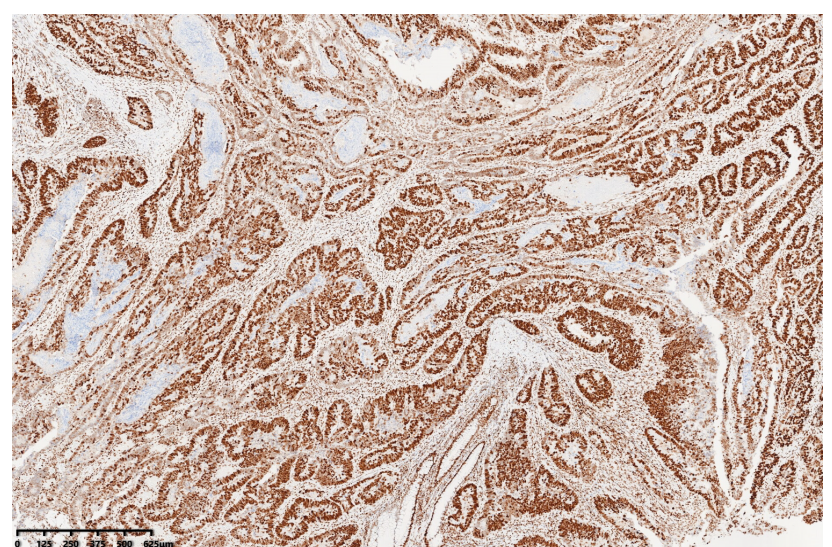

## MSI result

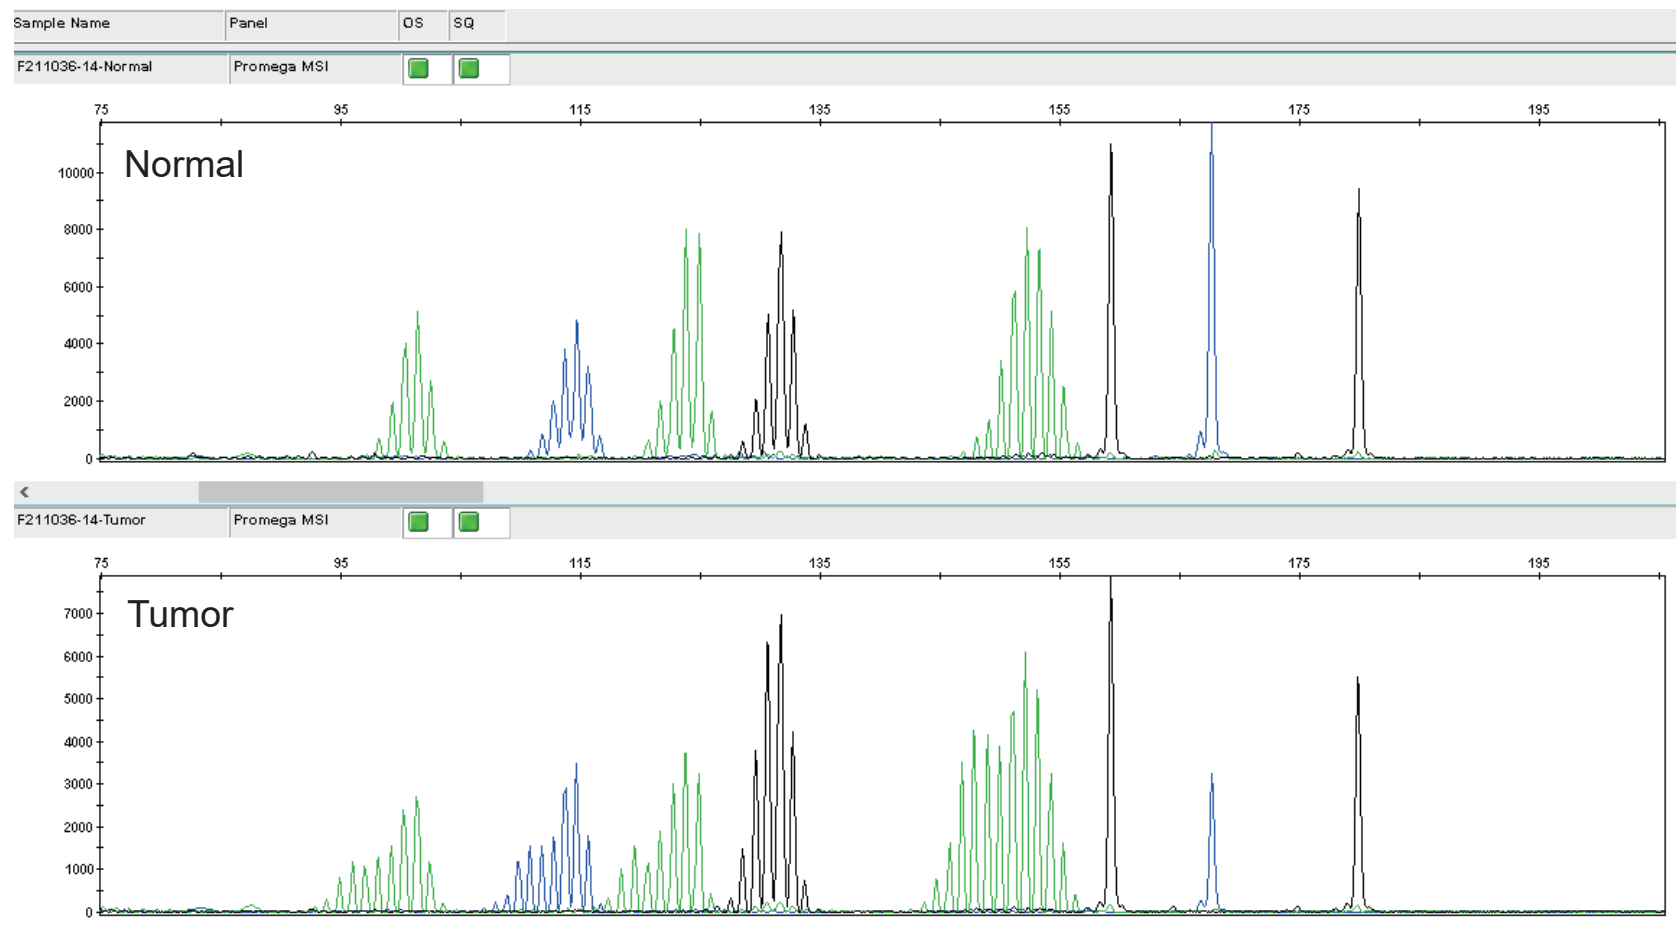

Supplement: mmc3.pdf [file mmc3.pdf]

# Supplementary Figure S2

a

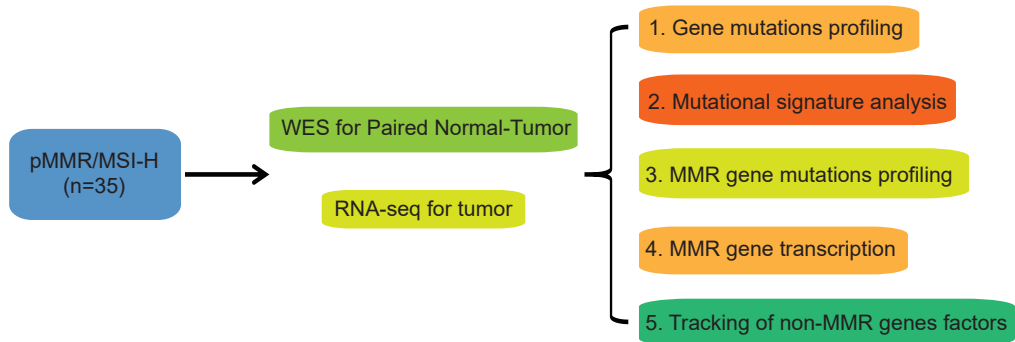

b

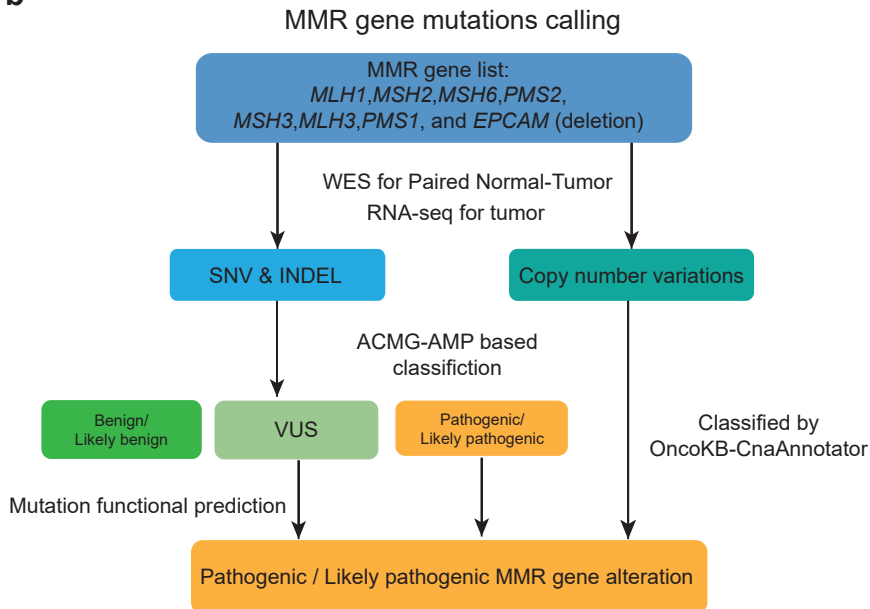

Supplement: mmc4.pdf [file mmc4.pdf]

# Supplementary Figure S3

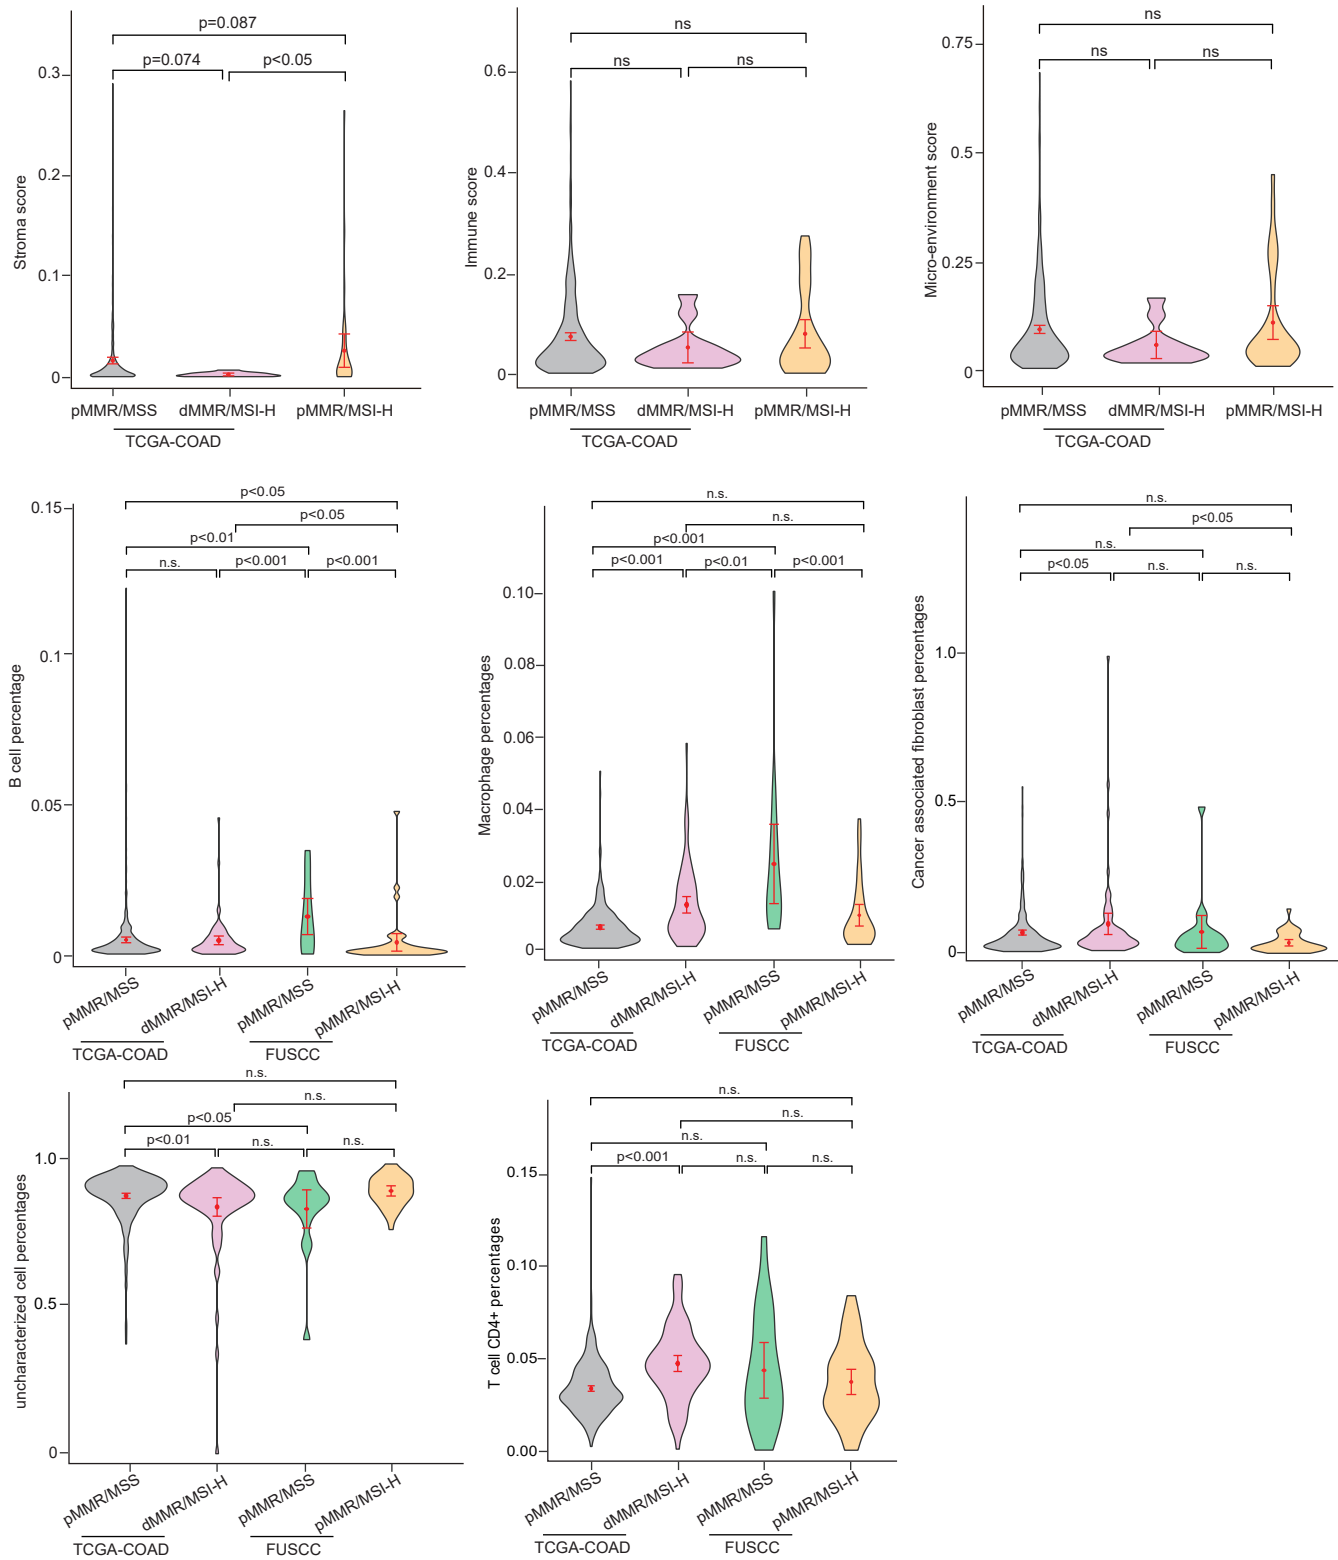

Supplement: mmc5.pdf [file mmc5.pdf]

# Supplementary Figure S4

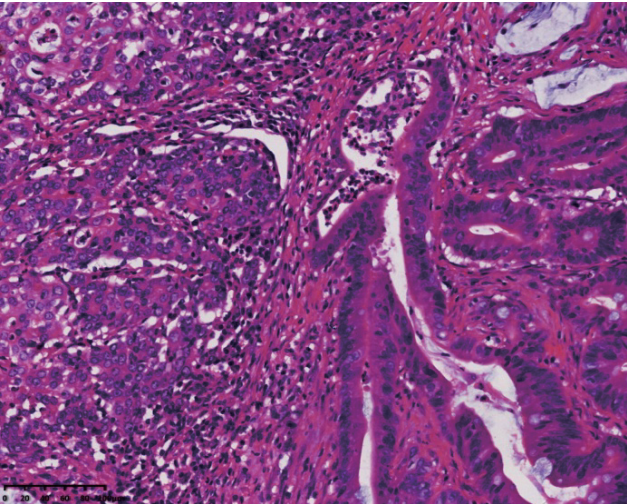

Hematoxylin–eosin staining

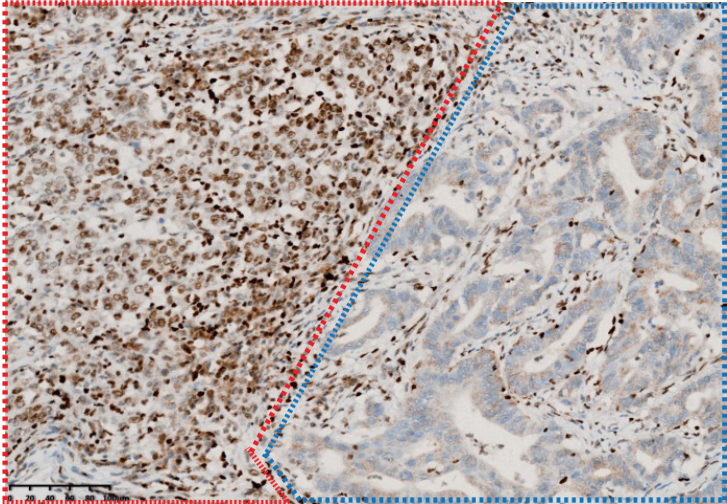

*hMSH2*

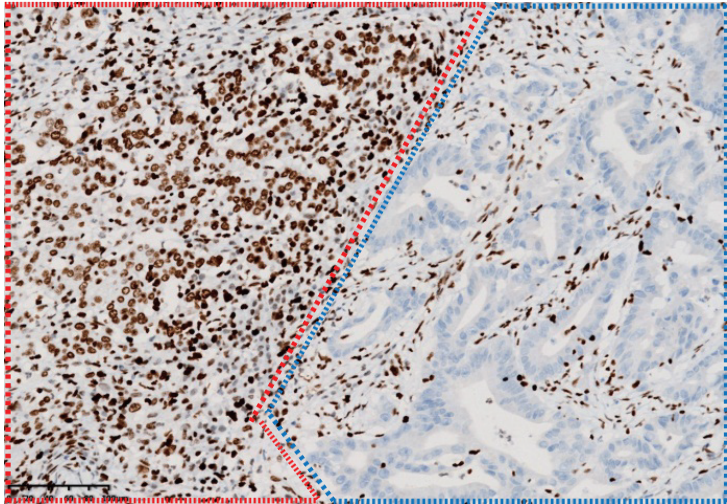

*hMSH6*

- dMMR
- pMMR

Supplement: mmc6.pdf [file mmc6.pdf]
